# Supplementary material for: Co-production of microbial oil and exopolysaccharide by the oleaginous yeastSporidiobolus pararoseusgrown in fed-batch culture
Source: Royal Society of Chemistry journal article supplement (doi:10.1039/c7ra12813d), 2018-01-01
Supplement: c7ra12813d1.pdf [file c7ra12813d1.pdf]

**Co-production of microbial oil and exopolysaccharide by the oleaginous yeast  
*Sporidiobolus pararoseus* grown in fed-batch culture**

**Mei Han<sup>1,2</sup>, Jian-Zhong Xu<sup>1,\*</sup>, Zhen-Min Liu<sup>2</sup>, He Qian<sup>3</sup>, Wei-Guo Zhang<sup>1</sup>**

1: The Key Laboratory of Carbohydrate Chemistry and Biotechnology, Ministry of Education, School of Biotechnology, Jiangnan University, 1800# Lihu Road, WuXi 214122, Jiangsu Province, China

2: State Key Laboratory of Dairy Biotechnology, Technology Center Bright Dairy & Food Co., Ltd, 1518# Jiangchang West Road, Shanghai 200436, China

3: School of food science and technology, Jiangnan University, 1800# Lihu Road, Wuxi-214122, Jiangsu Province, China

\* Corresponding authors:

Jian-Zhong Xu; E-mail: [xujianzhong@jiangnan.edu.cn](mailto:xujianzhong@jiangnan.edu.cn); Tel: +86-510-85329312; Fax: +86-510-85329312

## **1 Thin layer chromatography**

The preparation of samples was carried out according to the reports of Han et al.<sup>1</sup>. When analyzing the fat soluble nutrients in *S. pararoseus* oil by TLC, extracts were spotted on a silica gel plate (60GF254 plate; Amresco, Ohio, USA) with benzine:ethyl acetate:acetone (1:1:1, v/v) solvent as developing solvent. The standard sample was used to compare spots with extracts.

## **2 The separation of the fat soluble nutrients in *S. pararoseus* oil by High-performance chromatography (HPLC)**

The major components were quantified by a high-performance liquid chromatograph (HPLC; Hitachi L-2000, Japan ) equipped with a photodiode array detector and using C<sub>18</sub> column (25 mm×4.6 mm; 4.6 μm particle size; Agilent, USA). Isocratic elution analysis was carried out with acetonitrile:tetrahydrofuran=60:40 described in our laboratory previous study<sup>2</sup>.

## **3 The component identification by mass spectrometry (HPLC-MS)**

The identifications of oils and carotenoids were analyzed by a mass spectrometry (MS) equipped with a Waters ACQUITY PDA detector and BEH C<sub>18</sub> column (2.1 mm×100 mm and filler diameter is 1.7 μm; Waters, USA). The detail of operation was carried out according to the description of Han et al.<sup>3</sup>.

**Table S1** The composition of exopolysaccharide produced by different yeasts

| Yeast strain                                       | Molecular weight (kDa) | Monosaccharide composition                                                                      | References |
|----------------------------------------------------|------------------------|-------------------------------------------------------------------------------------------------|------------|
| <i>Sporobolomyces salmonicolor</i> AL <sub>1</sub> | >1000                  | 54.1% of glucose, 42.6% of mannose, and 3.3% of fucose                                          | 4, 5       |
| <i>Cryptococcus laurentii</i> AL <sub>100</sub>    | 4.2                    | 61.1% of arabinose, 15.0% of mannose, 12.0% of glucose, 5.9% of galactose, and 2.8% of rhamnose | 6          |
| <i>Cryptococcus flavus</i> A51                     | 1010                   | 55.1% of mannose, 26.1% of glucose, 9.60% of xylose, and 1.90% of galactose                     | 7          |
| <i>Rhodotorula acheniorum</i> MC                   | Component 1: 310       | Component 1: 92.8% of mannose                                                                   | 8          |
|                                                    | Component 2: 249       | Component 2: 90.6% of mannose                                                                   |            |
| <i>Rhodotorula glutinis</i> KCTC 7989              | 100-380                | 85% of neutral sugars (mannose:fructose:glucose:galactose=67:2:1:1) and 15% of uronic acid      | 9          |
| <i>Pichia (Hansenula) holstii</i> NRRL Y-2448      | 5000-39000             | mannose:phosphorus:potassium=5:1:1                                                              | 10, 11     |
| <i>Sporidiobolus pararoseus</i> JD-2               | 1300                   | galactose:glucose:mannose=16:8:1                                                                | This study |

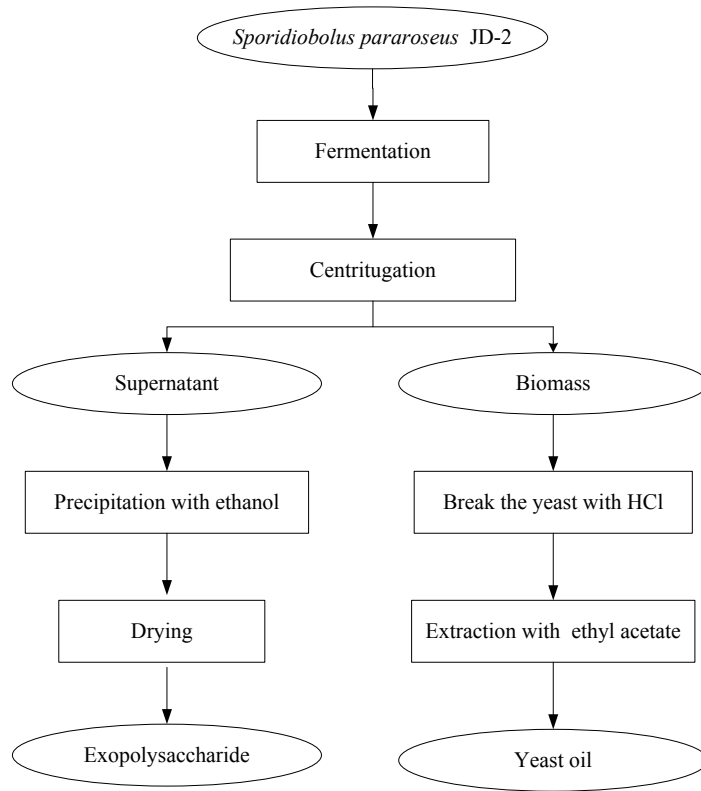

Figure S1. The scheme for co-production of exopolysaccharide and oil by *S. pararoseus* JD-2.

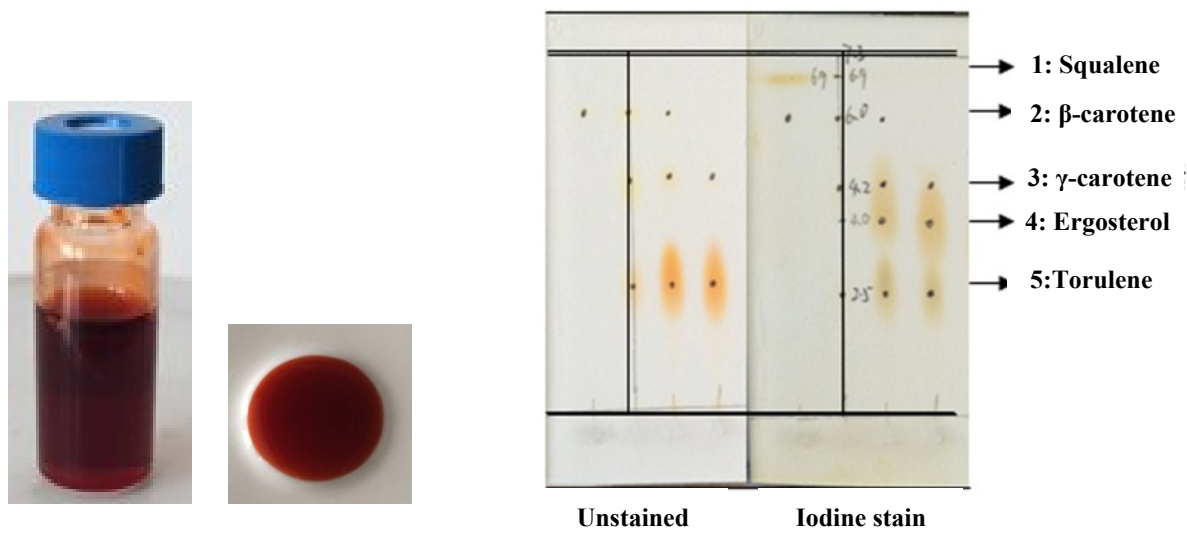

**Figure S2.** The sample and its thin-layer chromatography of oil produced by *S. pararoseus* JD-2.

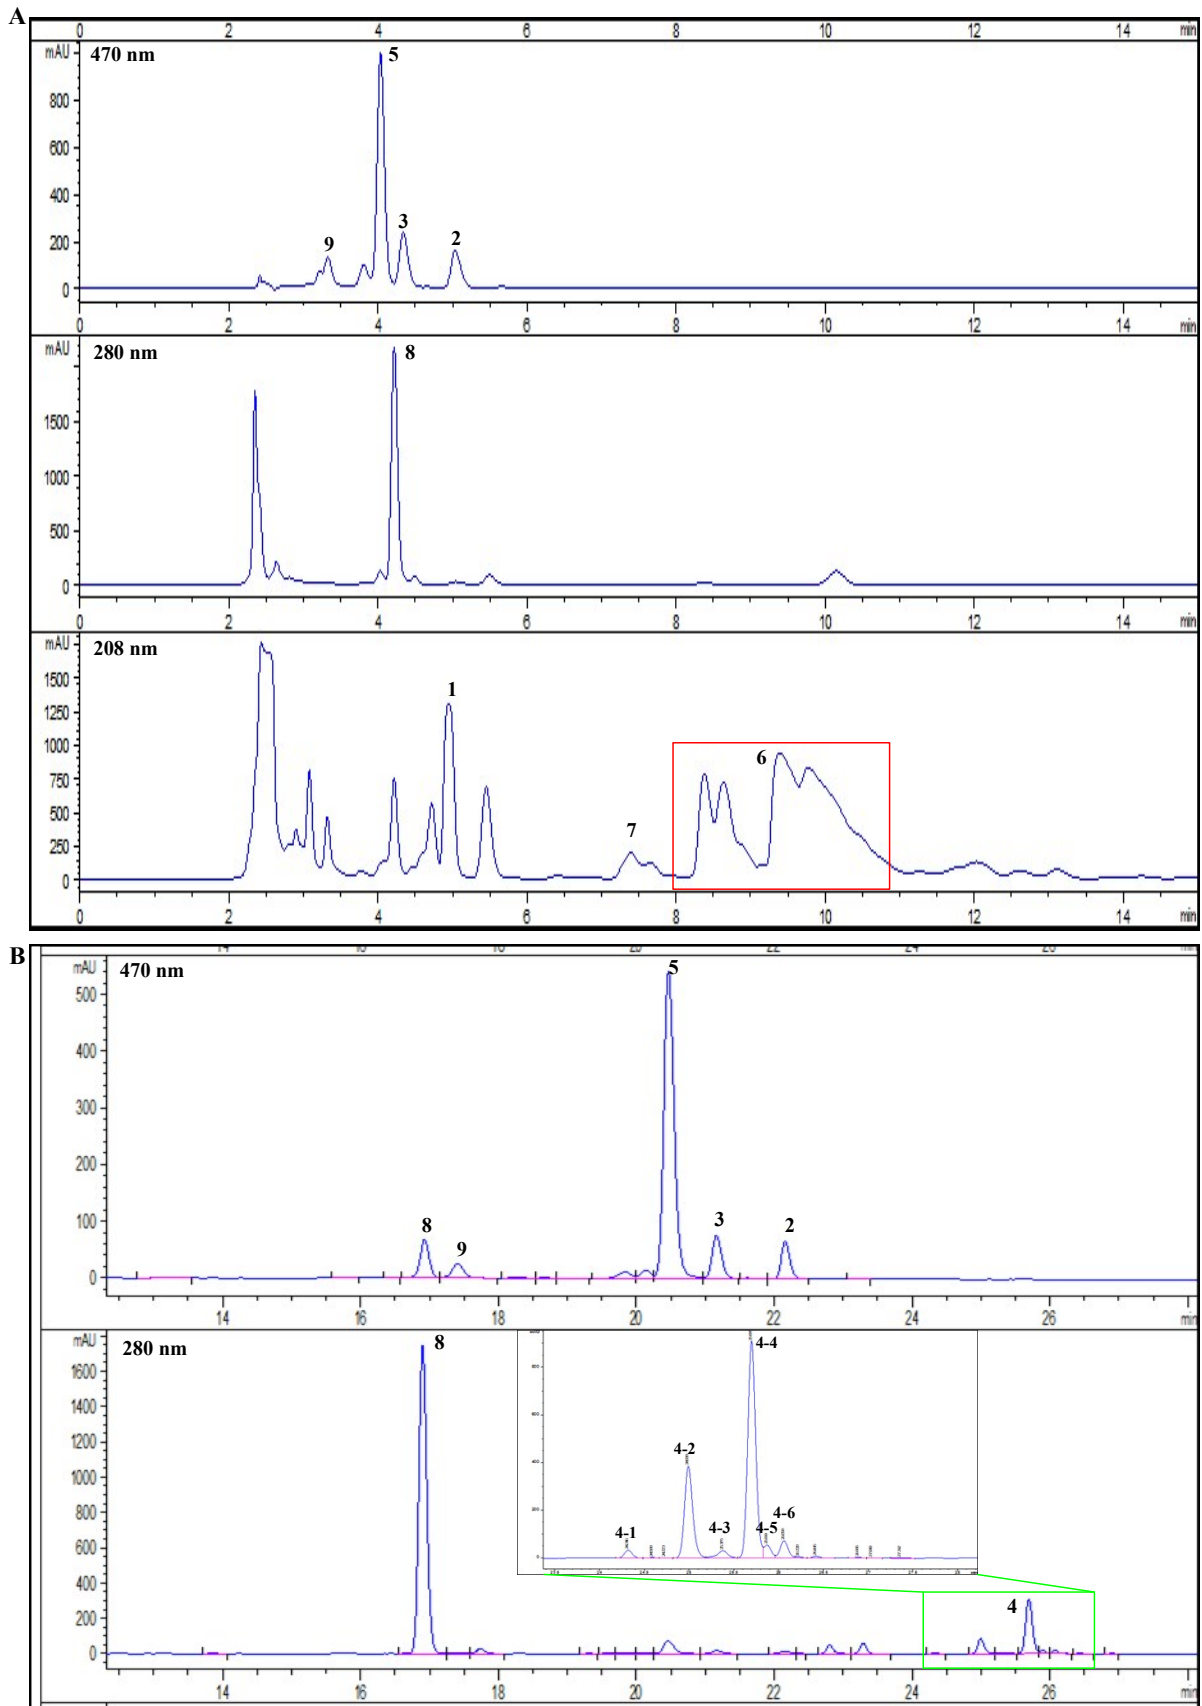

Figure S3. The main compositions of oil produced by *S. pararoseus* JD-2 separated by isocratic elution (A)

and by gradient elution (B). Chromatographic peaks: peak 1 - Squalene; peak 2 -  $\beta$ -carotene; peak 3 -  $\gamma$ -carotene; peak 4-1~4-6 - Ergosterol ester; peak 5 - Torulene; peak 6 - Triglyceride; peak 7 - Free fatty acid; peak 8 - Ergosterol; peak 9 - Torularhodin. The red frame represents the same composition, and the springgreen frame represents data amplification.

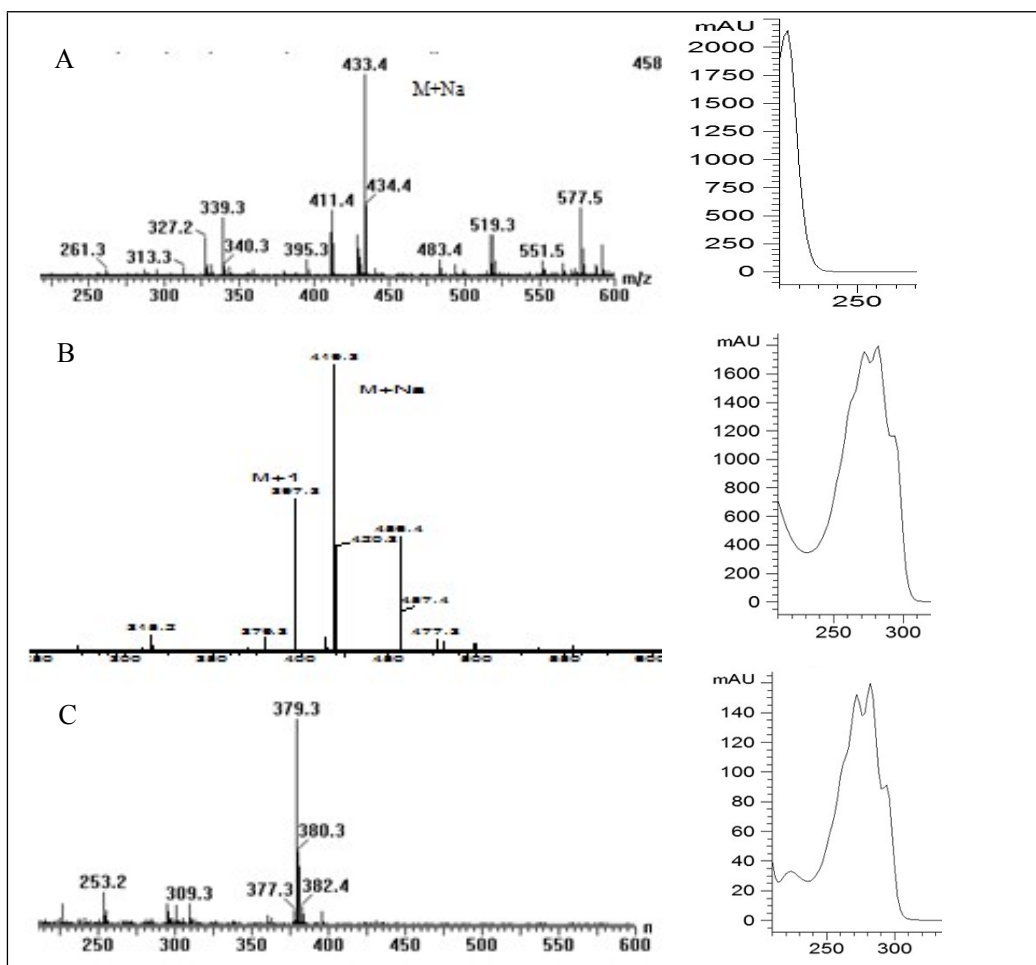

Figure S4. HPLC-MS and UV spectrum of squalene (A), ergosterol (B) and ergosterol esters (C).



Crude oil

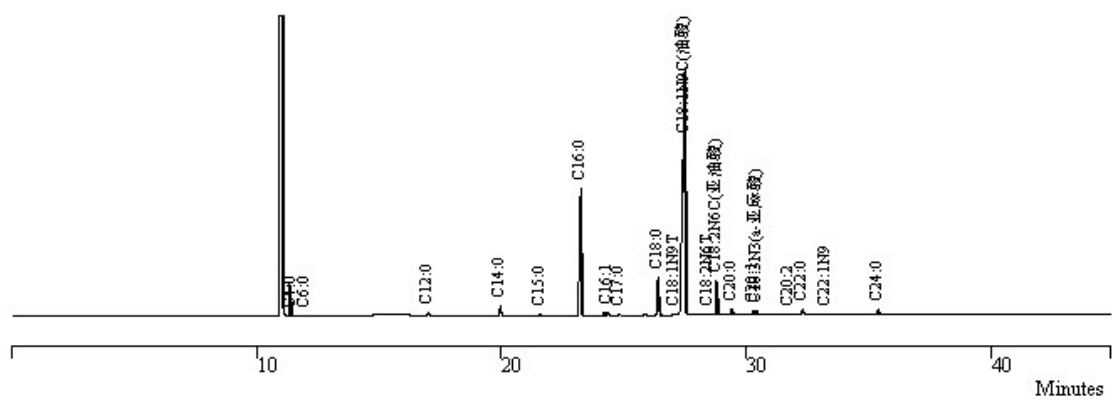

Standards

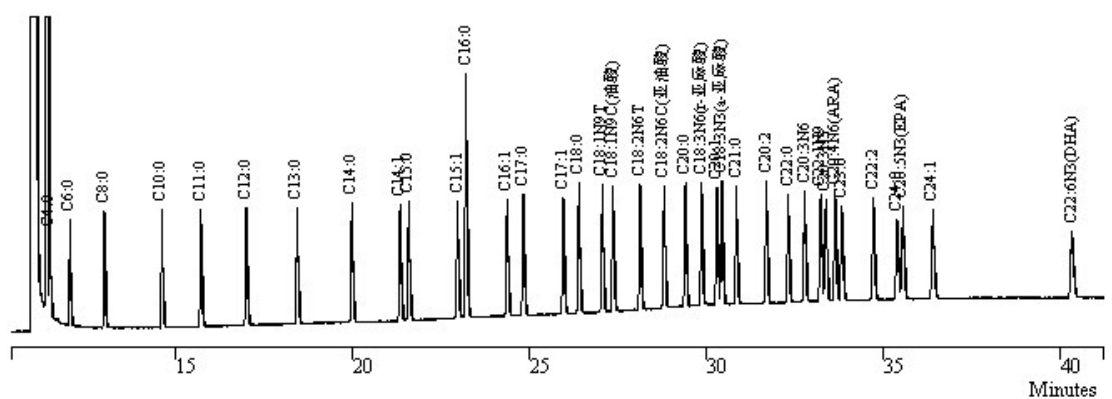

Figure S5. The main compositions of fat soluble nutrients in *S. parvovirus* oil separated by HPLC.

## Supplementary References

1. M. Han, Z. Y. Xu, C. Du, H. Qian and W. G. Zhang, *Bioproc Biosyst Eng*, 2016, **39**, 1425-1433.
2. Q. Shi, H. Wang, C. Du, W. Zhang and H. Qian, *Anal. Sci.*, 2013, **29**, 997-1002.
3. M. Han, Q. He and W. G. Zhang, *Prep Biochem Biotechnol*, 2012, **42**, 293-303.
4. S. Dimitrova, K. Pavlova, L. Lukanov, E. Korotkova, E. Petrova, P. Zagorchev and M. Kuncheva, *Appl Biochem Biotech*, 2013, **169**, 301-311.
5. A. Poli, G. Anzelmo, G. Tommonaro, K. Pavlova, A. Casaburi and B. Nicolaus, *Folia Microbiol*, 2010, **55**, 576-581.
6. K. Pavlova, S. Rusinova-Videva, M. Kuncheva, M. Kratchanova, M. Gocheva and S. Dimitrova, *Appl Biochem Biotech*, 2011, **163**, 1038-1052.
7. K. Pavlova, I. Panchev, M. Krachanova and M. Gocheva, *Folia Microbiol*, 2009, **54**, 343-348.
8. K. Pavlova and D. Grigorova, *Food Res Int*, 1999, **32**, 473-477.
9. D. H. Cho, H. J. Chae and E. Y. Kim, *Appl Biochem Biotech*, 2001, **95**, 183-193.
10. A. Jeanes, J. E. Pittsley, P. R. Watson and R. J. Dimler, *Arch Biochem Biophys*, 1961, **92**, 343-350.
11. L. A. Parolis, H. Parolis, L. Kenne, M. Meldal and K. Bock, *Carbohydr. Res.*, 1998, **309**, 77-87.
